# Supplementary material for: Identification of long non-coding RNAs expressed in knee and hip osteoarthritic cartilage
Source: PubMed Central journal article supplement (PMC6444060; doi:10.1016/j.joca.2018.12.015), 2019-04
Supplement: mmc2.pdf [file mmc2.pdf]

## Supplementary Figure 2

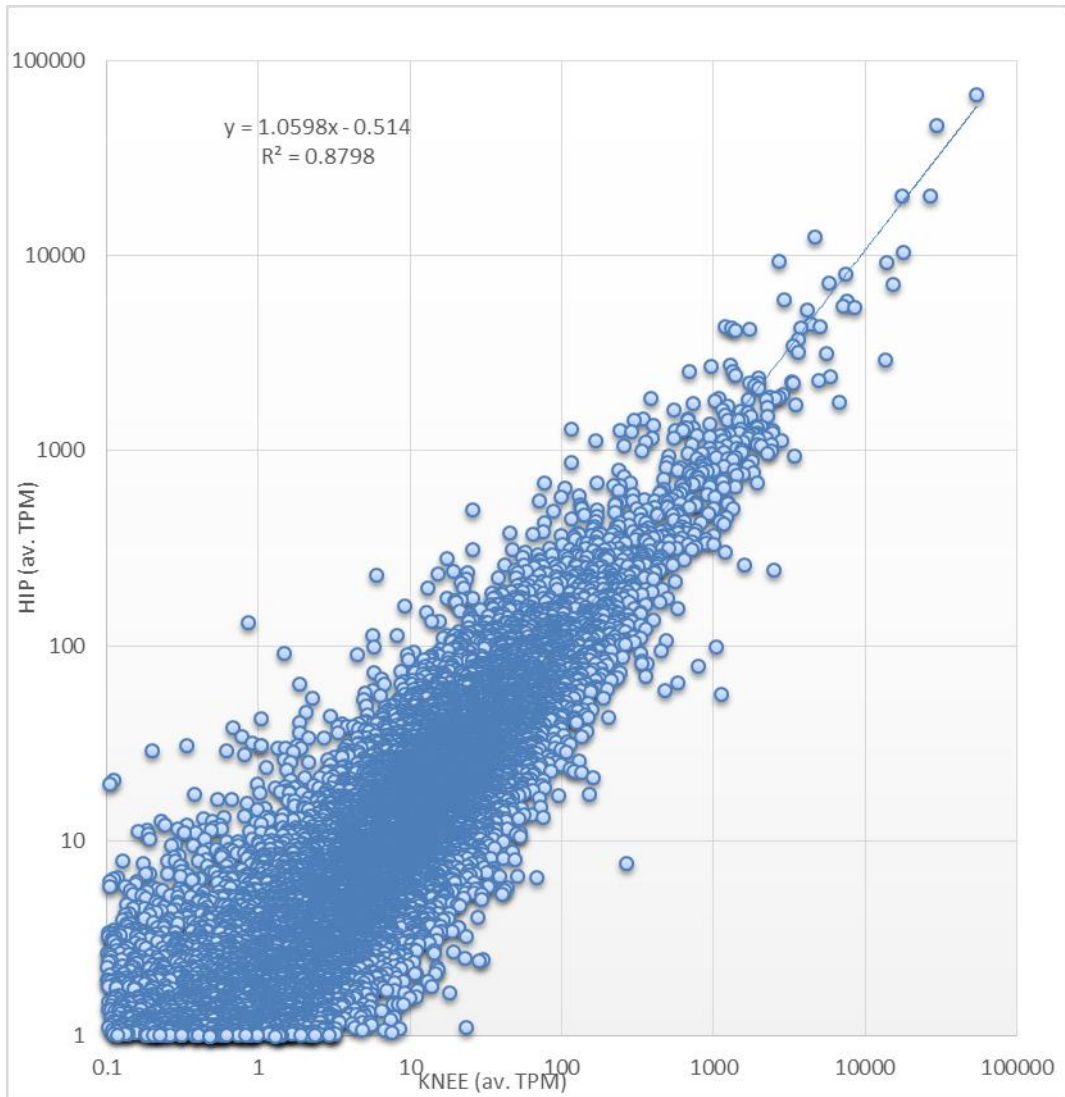

Correlation of expression level (average TPM) between protein-coding genes expressed in common between hip and knee cartilage. In total 12625 transcripts with an expression level  $\text{TPM} \geq 1$  were expressed in both conditions. The data were significantly correlated ( $p < 0.00001$ ).
